# Supplementary material for: Impact of microstructure and crystallinity on surface exchange kinetics of strontium titanium iron oxide perovskite byin situoptical transmission relaxation approach
Source: Royal Society of Chemistry journal article supplement (doi:10.1039/c7ta04940d), 2017-01-01
Supplement: c7ta04940d1.pdf [file c7ta04940d1.pdf]

## Supporting information

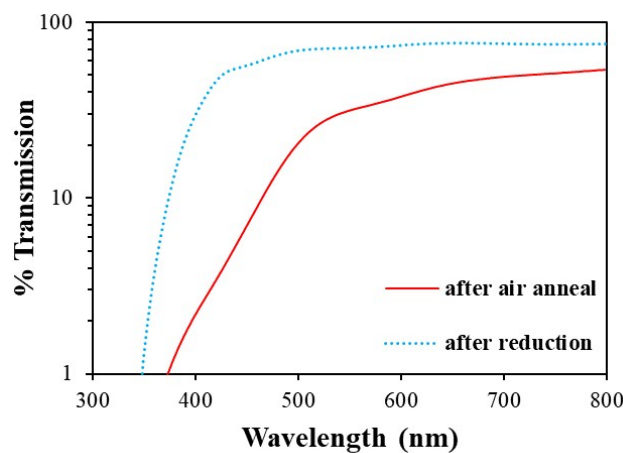

Figure S1. Representative light transmission spectra for STF35 film grown at 700 °C, post-annealed in air or 4% $H_2$ /96% $N_2$  at 500 °C for 5 h, and measured in air at room temperature.

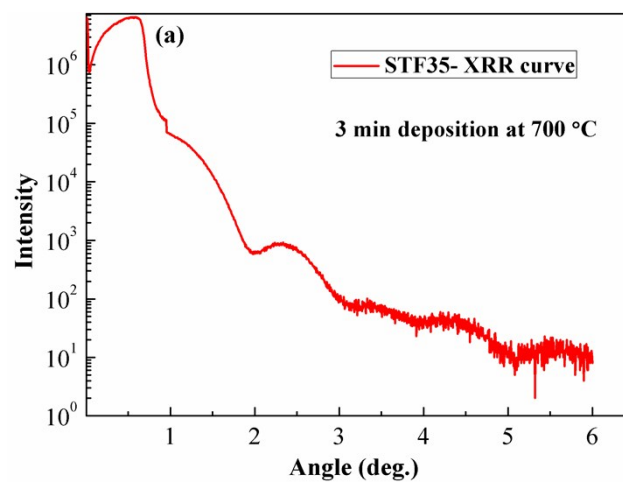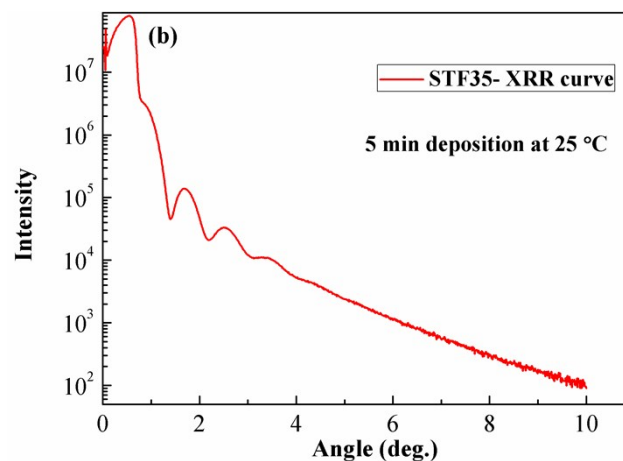

Figure S2. X-ray reflectivity (XRR) curves of STF35 thin films grown by PLD: a) 3 min deposition at 700 °C (3.7 nm thick); b) 5 min deposition at 25 °C (4.7nm thick).

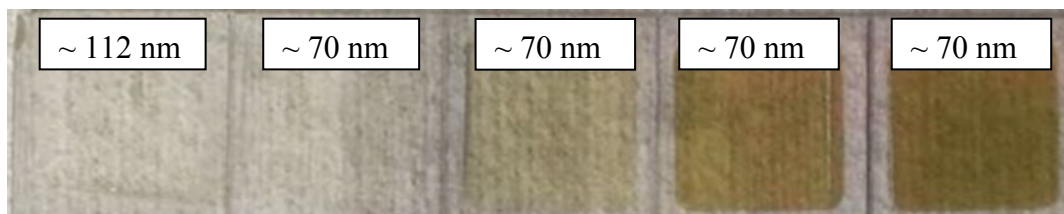

Figure S3. Photograph of 25 °C, 400 °C, 580 °C, 700 °C and 800 °C-grown STF35 thin films (increasing growth temperature from left to right) on YSZ substrates. Films are 70-112 nm thick, as labeled.

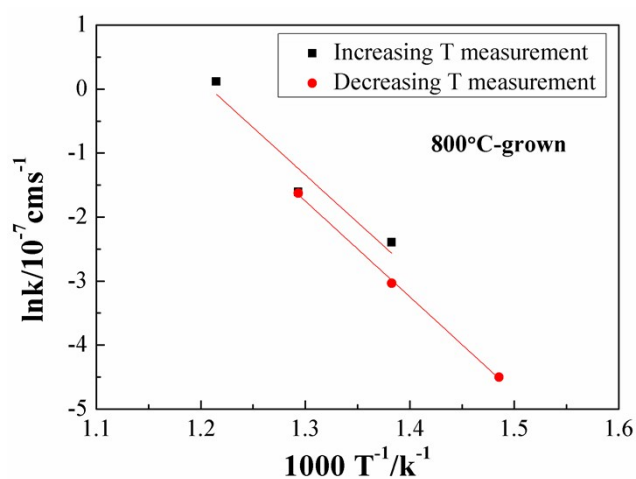

Figure S4. Arrhenius plot of  $k_{\text{chem}}$  for 800 °C-grown thin film during heating (first) and cooling (second) measurements showing repeatable activation energy, 1.28 eV and 1.29 eV, respectively.

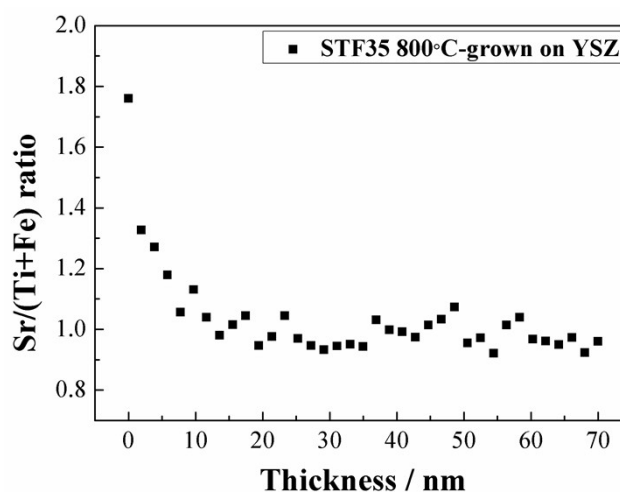

Figure S5. XPS depth profile (by sputtering) for 800 °C-grown thin film

Table S1. The chemical oxygen surface exchange coefficient of 700 °C -grown STF35 thin film after 100 h aging with 5 times redox cycling (21% / 4% O<sub>2</sub>)

| <b>k/10<sup>-7</sup>cms<sup>-1</sup></b> | <b>1st reduction</b> | <b>2nd</b> | <b>3rd</b> | <b>4th</b> | <b>5th</b> |
|------------------------------------------|----------------------|------------|------------|------------|------------|
| 600 °C                                   | 2.86                 | 2.46       | 2.18       | 2.17       | 1.79       |
| 550 °C                                   | 0.108                | 0.105      | 0.104      | 0.097      | 0.094      |
